# Supplementary material for: Screening and Analysis of Potential Inhibitors of SHMT2
Source: MDPI journal article supplement (doi:10.3390/biophysica3040044), 2023-12-03
Supplement: s1 [file s1]

# Supporting Information

## Screening and Analysis of Potential Inhibitors of SHMT2

Bojin Chen<sup>1,3</sup> and John Z.H. Zhang<sup>1-5\*</sup>

*<sup>1</sup>Shanghai Engineering Research Center of Molecular Therapeutics & New Drug Development, School of Chemistry and Molecular Engineering, East China Normal University, Shanghai, 200062, China*

*<sup>2</sup>Faculty of Synthetic Biology and Institute of Synthetic Biology, Shenzhen Institutes of Advanced Technology, Chinese Academy of Sciences, Shenzhen, Guangdong, 518055, China.*

*<sup>3</sup>NYU-ECNU Center for Computational Chemistry at NYU Shanghai, Shanghai, 200062, China*

*<sup>4</sup>Department of Chemistry, New York University, New York 10003, United States*

*<sup>5</sup>Collaborative Innovation Center of Extreme Optics, Shanxi University, Taiyuan, Shanxi, 030006,*

Email: john.zhang@nyu.edu

Table S1. The structures of 38 compounds screened

| Name | ChemDiv ID | Structure                                                                            | Ranking |
|------|------------|--------------------------------------------------------------------------------------|---------|
| C1_1 | 6959-0433  | 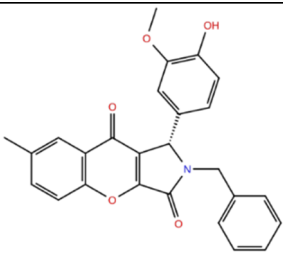   | 1941    |
| C2_1 | D074-0258  |    | 2179    |
| C3_1 | Y040-5749  |    | 3125    |
| C4_1 | E989-1016  |   | 1962    |
| C5_1 | F292-0008  |  | 2495    |
| C6_1 | C728-0759  |  | 860     |
| C7_1 | D135-0017  |  | 2602    |

| Name  | ChemDiv ID | Structure                                                                            | Ranking |
|-------|------------|--------------------------------------------------------------------------------------|---------|
| C8_1  | 4552-4287  | 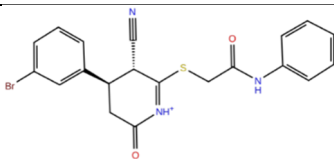   | 2779    |
| C9_1  | D008-0182  |    | 1525    |
| C10_1 | F833-1062  |    | 3205    |
| C11_1 | S948-5040  |    | 1553    |
| C12_1 | 8010-8303  |  | 1949    |
| C12_2 | 8012-5183  |  | 2416    |
| C12_3 | 3629-0287  |  | 920     |
| C12_4 | 3629-0311  |  | 1361    |

| Name   | ChemDiv ID | Structure                                                                            | Ranking |
|--------|------------|--------------------------------------------------------------------------------------|---------|
| C12_5  | 3448-5845  | 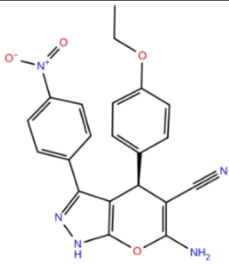   | 1590    |
| C12_6  | 8010-8305  |    | 2746    |
| C12_7  | 3543-0016  |    | 1582    |
| C12_8  | 8012-3540  |   | 1812    |
| C12_9  | 8010-8306  |  | 1413    |
| C12_10 | 3448-6597  |  | 2644    |
| C12_11 | 3629-0271  |  | 1757    |
| C12_12 | 8012-4430  |  | 1947    |

| Name   | ChemDiv ID | Structure                                                                            | Ranking |
|--------|------------|--------------------------------------------------------------------------------------|---------|
| C12_13 | 3394-0195  | 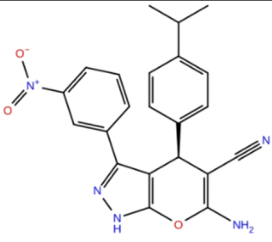   | 3287    |
| C12_14 | 4333-3946  |    | 1268    |
| C12_15 | 3394-0367  |    | 1017    |
| C12_16 | 3394-0352  |   | 1218    |
| C12_17 | 8015-0700  |  | 2544    |
| C12_18 | 3629-0318  |  | 1784    |
| C12_19 | 8019-9096  |  | 2844    |

| Name   | ChemDiv ID | Structure                                                                            | Ranking |
|--------|------------|--------------------------------------------------------------------------------------|---------|
| C12_20 | 4036-0469  | 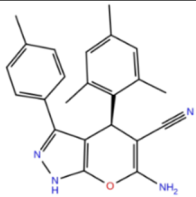   | 2898    |
| C13_1  | 7210-1772  |    | 1830    |
| C14_1  | E216-0908  |    | 3592    |
| C15_1  | D294-4253  |   | 1370    |
| C16_1  | Y020-6497  |  | 1091    |
| C17_1  | C076-0017  |  | 1937    |
| C18_1  | G568-0078  |  | 3095    |
| C19_1  | C276-1306  |  | 2961    |

Table S2. Compound rankings among the seven scoring functions.

| Name   | Glide<br>Score | AA-<br>Score | $\Delta$ vinaXGB | ad4<br>_scoring | vina | vinardo | dkoes<br>_scoring | Overall<br>ranking |
|--------|----------------|--------------|------------------|-----------------|------|---------|-------------------|--------------------|
| C6_1   | 1336           | 919          | 603              | 1364            | 768  | 487     | 545               | 860                |
| C12_3  | 1072           | 1714         | 411              | 1775            | 233  | 416     | 822               | 920                |
| C12_15 | 3548           | 114          | 919              | 707             | 649  | 640     | 541               | 1017               |
| C16_1  | 103            | 98           | 1355             | 678             | 886  | 3140    | 1375              | 1091               |
| C12_16 | 4087           | 335          | 157              | 639             | 88   | 1694    | 1527              | 1218               |
| C12_14 | 3409           | 434          | 1349             | 759             | 1481 | 420     | 1021              | 1268               |
| C12_4  | 1442           | 2640         | 274              | 3179            | 98   | 120     | 1774              | 1361               |
| C15_1  | 3301           | 1126         | 915              | 1082            | 487  | 1721    | 956               | 1370               |
| C12_9  | 2513           | 1901         | 457              | 3164            | 600  | 170     | 1087              | 1413               |
| C9_1   | 3400           | 1012         | 1071             | 2906            | 1372 | 606     | 307               | 1525               |
| C11_1  | 842            | 99           | 2462             | 2035            | 2811 | 1651    | 969               | 1553               |
| C12_7  | 2126           | 2851         | 364              | 1905            | 215  | 2261    | 1354              | 1582               |
| C12_5  | 1556           | 473          | 1785             | 3026            | 1099 | 1231    | 1962              | 1590               |
| C12_11 | 3116           | 1758         | 1112             | 3546            | 688  | 472     | 1607              | 1757               |
| C12_18 | 4255           | 2640         | 173              | 2037            | 151  | 36      | 3193              | 1784               |
| C12_8  | 2331           | 1785         | 1185             | 4101            | 1838 | 438     | 1004              | 1812               |
| C13_1  | 524            | 3764         | 1353             | 2111            | 805  | 1046    | 3204              | 1830               |
| C17_1  | 4443           | 2390         | 568              | 342             | 446  | 3008    | 2363              | 1937               |
| C1_1   | 3602           | 4323         | 931              | 313             | 751  | 91      | 3576              | 1941               |
| C12_12 | 3145           | 3252         | 180              | 4048            | 273  | 237     | 2492              | 1947               |
| C12_1  | 428            | 1621         | 1142             | 3928            | 647  | 2784    | 3094              | 1949               |
| C4_1   | 4382           | 1            | 4011             | 951             | 3508 | 546     | 333               | 1962               |
| C2_1   | 4041           | 3834         | 1421             | 1750            | 601  | 1744    | 1861              | 2179               |
| C12_2  | 781            | 1248         | 4586             | 3198            | 3009 | 756     | 3337              | 2416               |
| C5_1   | 2518           | 746          | 3170             | 2793            | 3872 | 3375    | 988               | 2495               |
| C12_17 | 4101           | 3007         | 742              | 3904            | 706  | 1187    | 4159              | 2544               |
| C7_1   | 1              | 1656         | 4669             | 4654            | 3671 | 531     | 3034              | 2602               |
| C12_10 | 2948           | 3322         | 1714             | 4142            | 1163 | 3180    | 2040              | 2644               |
| C12_6  | 2117           | 1912         | 3572             | 4741            | 2462 | 1243    | 3172              | 2746               |
| C8_1   | 4617           | 2191         | 1615             | 2243            | 3284 | 2932    | 2573              | 2779               |
| C12_19 | 4373           | 2140         | 1944             | 2005            | 1679 | 2985    | 4784              | 2844               |
| C12_20 | 4453           | 2559         | 2495             | 4146            | 1659 | 3532    | 1442              | 2898               |
| C19_1  | 2940           | 4181         | 765              | 3860            | 1028 | 3024    | 4928              | 2961               |
| C18_1  | 3643           | 2619         | 3175             | 6001            | 3274 | 488     | 2465              | 3095               |
| C3_1   | 3478           | 4273         | 1277             | 4343            | 1524 | 4304    | 2677              | 3125               |
| C10_1  | 4288           | 1769         | 2729             | 1897            | 3387 | 4451    | 3913              | 3205               |
| C12_13 | 3197           | 4958         | 314              | 3656            | 2986 | 4472    | 3424              | 3287               |
| C14_1  | 4975           | 1346         | 4386             | 2583            | 4346 | 3501    | 4007              | 3592               |

Table S3. Specific values of binding free energy for 38 compounds and 8Z1 to SHMT2.

| Name   | $\Delta H(\text{kcal/mol})$ | IE(kcal/mol) | $\Delta G(\text{kcal/mol})$ |
|--------|-----------------------------|--------------|-----------------------------|
| C14_1  | -35.86                      | 3.59         | -32.27                      |
| C12_14 | -29.11                      | 3.89         | -25.22                      |
| C4_1   | -29.71                      | 5.03         | -24.68                      |
| 8Z1    | -29.22                      | 4.61         | -24.61                      |
| C12_19 | -28.13                      | 5.88         | -22.26                      |
| C12_15 | -27.21                      | 5.53         | -21.69                      |
| C1_1   | -25.72                      | 4.23         | -21.49                      |
| C11_1  | -26.79                      | 5.65         | -21.14                      |
| C6_1   | -25.51                      | 4.51         | -21.01                      |
| C10_1  | -27.20                      | 6.36         | -20.83                      |
| C12_17 | -25.59                      | 4.84         | -20.75                      |
| C12_16 | -25.01                      | 4.38         | -20.63                      |
| C16_1  | -27.03                      | 6.41         | -20.62                      |
| C12_1  | -26.37                      | 6.06         | -20.31                      |
| C12_2  | -25.31                      | 5.18         | -20.13                      |
| C19_1  | -24.87                      | 4.78         | -20.09                      |
| C12_5  | -24.39                      | 5.03         | -19.36                      |
| C12_3  | -22.71                      | 3.53         | -19.17                      |
| C15_1  | -24.28                      | 5.87         | -18.41                      |
| C8_1   | -21.70                      | 3.51         | -18.19                      |
| C12_10 | -23.35                      | 5.17         | -18.18                      |
| C12_8  | -22.91                      | 5.14         | -17.77                      |
| C5_1   | -23.30                      | 5.60         | -17.70                      |
| C2_1   | -22.95                      | 5.30         | -17.65                      |
| C17_1  | -21.27                      | 3.68         | -17.59                      |
| C18_1  | -21.69                      | 4.64         | -17.05                      |
| C12_20 | -22.13                      | 5.32         | -16.80                      |
| C12_9  | -20.69                      | 4.06         | -16.63                      |
| C12_11 | -19.01                      | 2.68         | -16.33                      |
| C9_1   | -22.11                      | 5.85         | -16.26                      |
| C12_12 | -21.16                      | 5.14         | -16.02                      |
| C3_1   | -21.82                      | 5.95         | -15.87                      |
| C13_1  | -18.22                      | 2.88         | -15.34                      |
| C12_7  | -18.52                      | 3.43         | -15.09                      |
| C12_13 | -21.19                      | 6.62         | -14.57                      |
| C12_4  | -20.50                      | 6.22         | -14.28                      |

| Name   | $\Delta H(\text{kcal/mol})$ | IE(kcal/mol) | $\Delta G(\text{kcal/mol})$ |
|--------|-----------------------------|--------------|-----------------------------|
| C12_6  | -20.02                      | 6.91         | -13.11                      |
| C12_18 | -19.55                      | 6.80         | -12.75                      |
| C7_1   | -20.81                      | 11.76        | -9.05                       |
